# Supplementary material
Source: MDPI journal article supplement (https://www.mdpi.com/2673-4540/2/4/25)
Supplement: s1 [file s1]

**Table S1.** Clinical characteristics of the included studies in the meta-analysis for controls (healthy individuals) and diabetic patients with normoalbuminuria and microalbuminuria

|              | Controls      | Normoalbuminuria | Microalbuminuria |
|--------------|---------------|------------------|------------------|
| <b>BMI</b>   | 23.01 ± 3.07  | 26.82 ± 4.3      | 26.95 ± 4.41     |
| <b>HbA1c</b> | 5.25 ± 1.05   | 7.23 ± 2.03      | 7.93 ± 2.6       |
| <b>eGFR</b>  | 96.3± 16.31   | 83.13± 19.44     | 68.46± 15.42     |
| <b>UACR</b>  | 11.98± 10.17  | 22.63± 4.28      | 94.29± 35.48     |
| <b>SBP</b>   | 132.44± 18.83 | 136.35± 12.68    | 141.75± 10.22    |
| <b>DBP</b>   | 82.54± 9.68   | 80.7± 7.21       | 83.65± 8.12      |

**BMI:** body mass index, **HbA1c:** glycated hemoglobin A1c, **eGFR:** estimated glomerular filtration rate, **UACR:** urinary albumin-creatinine ratio, **SBP:** systolic blood pressure, **DBP:** diastolic blood pressure

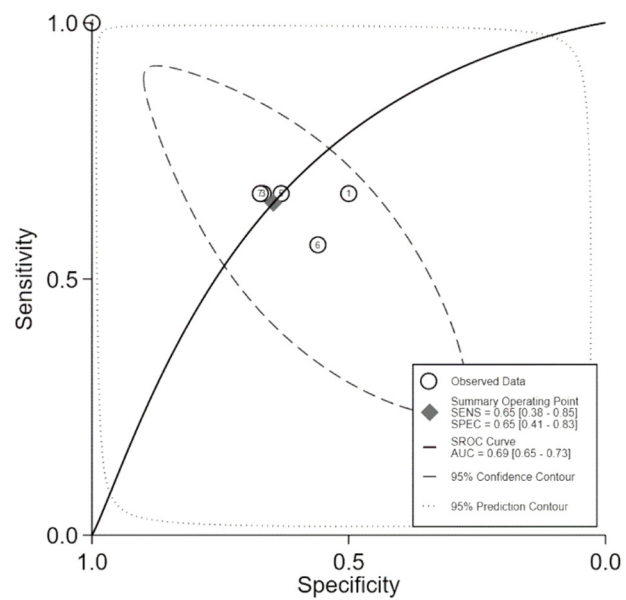

(a)

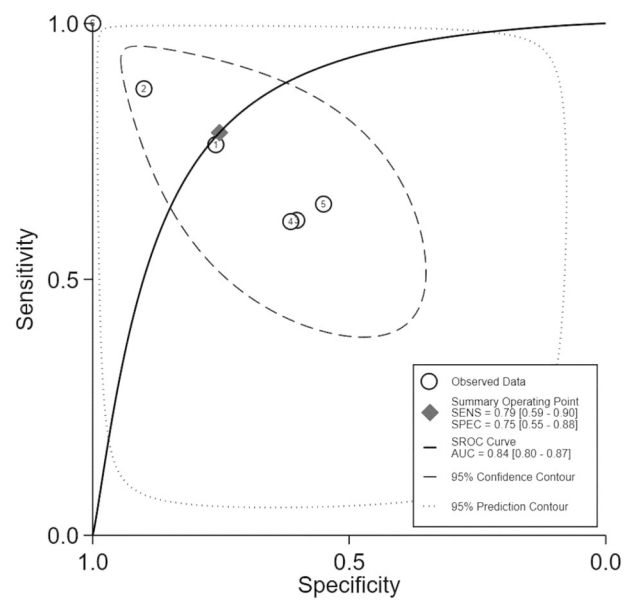

(b)

**Figure S1.** The hierarchical summary Receiver Operating Characteristic (hsROC) curve of uNAG **(a)** and uNAG/Cr **(b)** to discriminate normoalbuminuric diabetic patients from microalbuminuric diabetic patients.

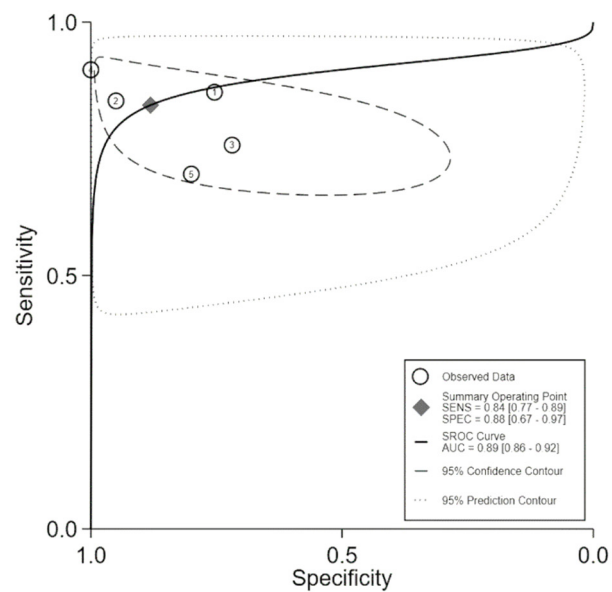

(a)

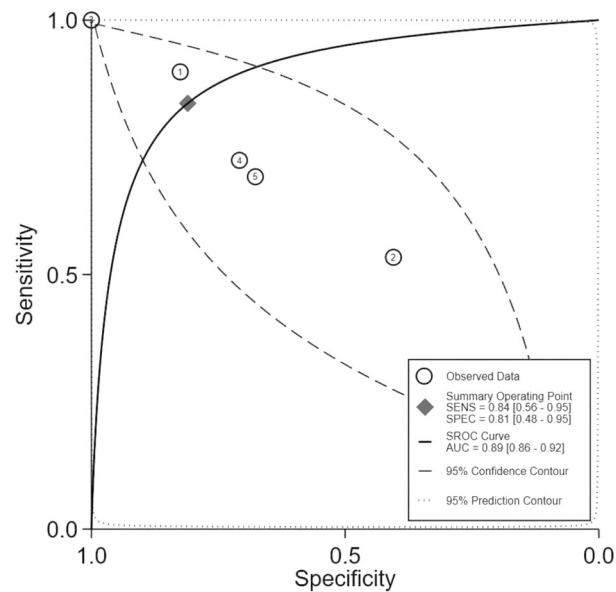

(b)

**Figure S2.** The hierarchical summary Receiver Operating Characteristic (hsROC) curve of uNAG (a) and uNAG/Cr (b) to discriminate controls (healthy individuals) from normo/microalbuminuricdiabetic patients.

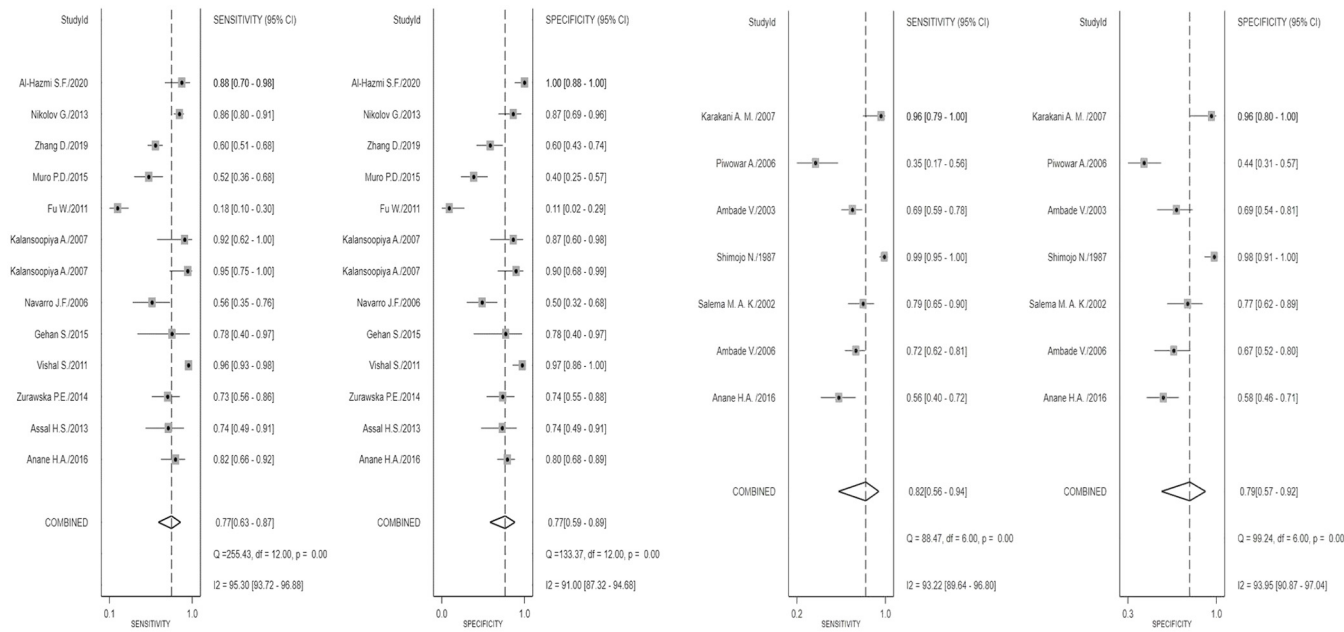

**Figure S3.** Forest plot for sensitivity and specificity of uNAG **(a)** and uNAG/Cr **(b)** to distinguish between controls (healthy individuals) from normoalbuminuric diabetic patients.

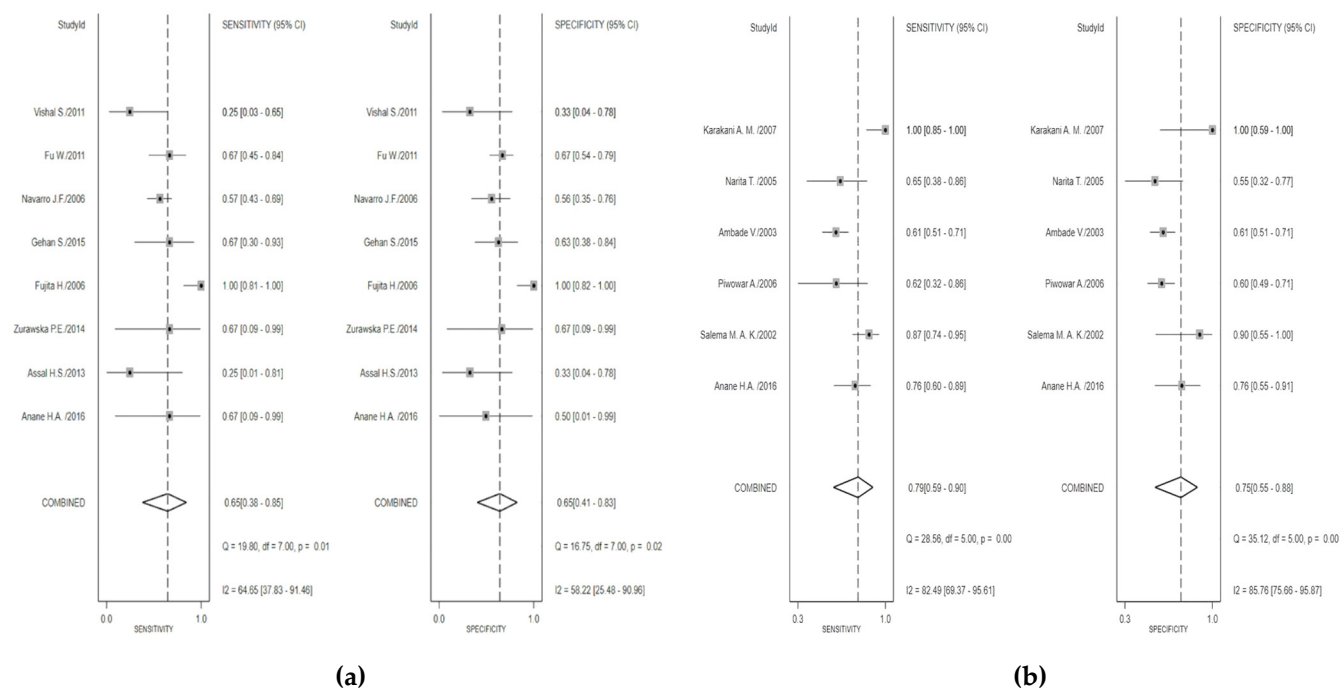

**Figure S4.** Forest plot for sensitivity and specificity of uNAG **(a)** and uNAG/Cr **(b)** to distinguish between normoalbuminuric diabetic patients and microalbuminuric diabetic patients.

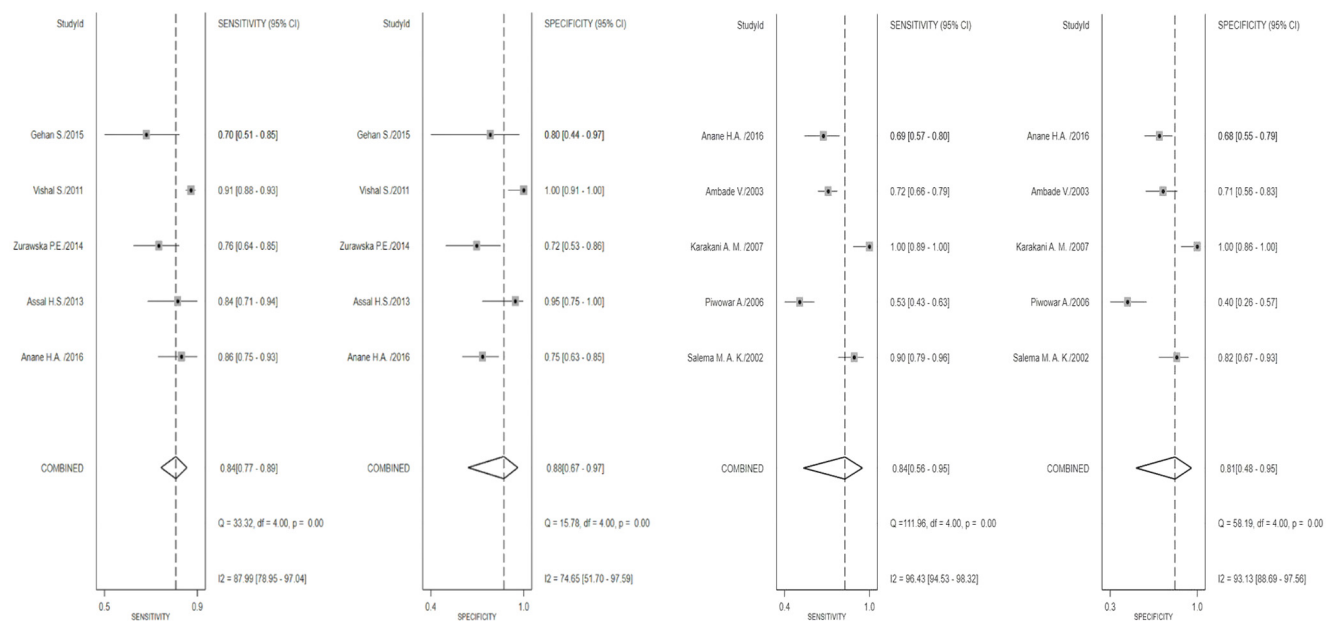

(a)

(b)

**Figure S5.** Forest plot for sensitivity and specificity of uNAG (a) and uNAG/Cr (b) to distinguish between controls (healthy individuals) and normo/microalbuminuric diabetic patients.

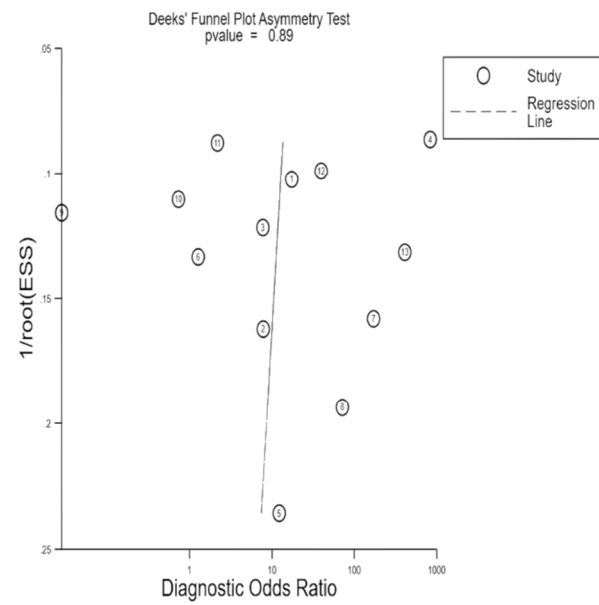

(a)

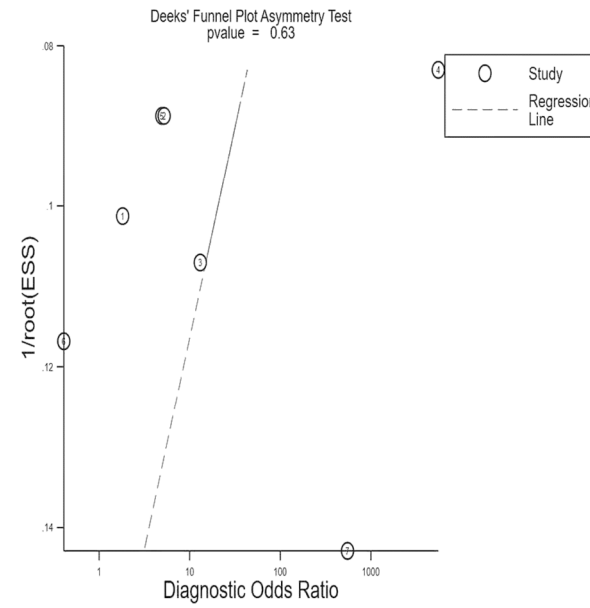

(b)

**Figure S6.** Deek's funnel plot for the evaluation of publication bias of uNAG (a) and uNAG/Cr (b) to distinguish between controls (healthy individuals) and normoalbuminuric diabetic patients.

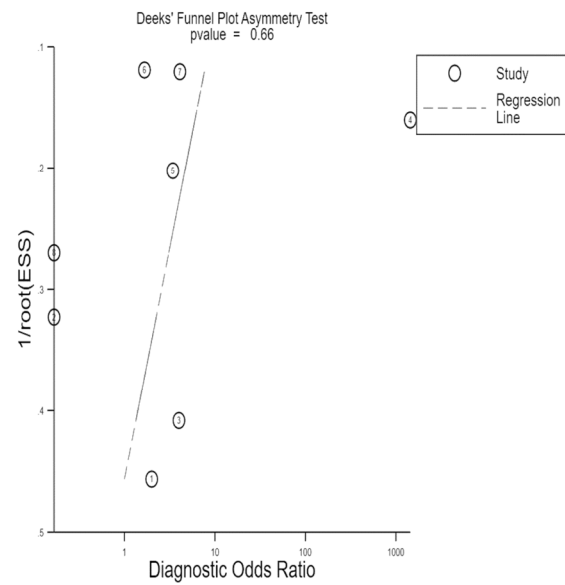

**(a)**

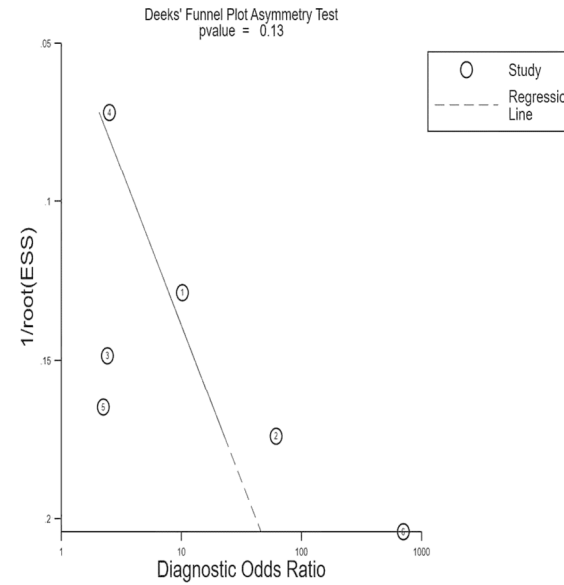

**(b)**

**Figure S7.** Deek's funnel plot for the evaluation of publication bias of uNAG **(a)** and uNAG/Cr **(b)** to distinguish between normoalbuminuric diabetic patients and microalbuminuric diabetic patients.



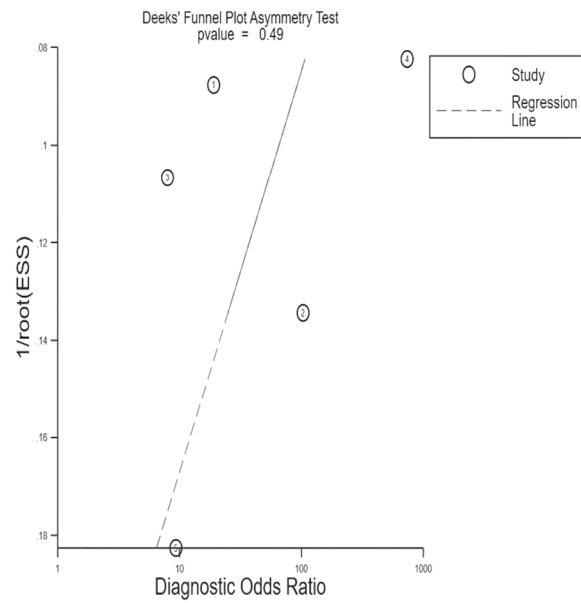

**(a)**

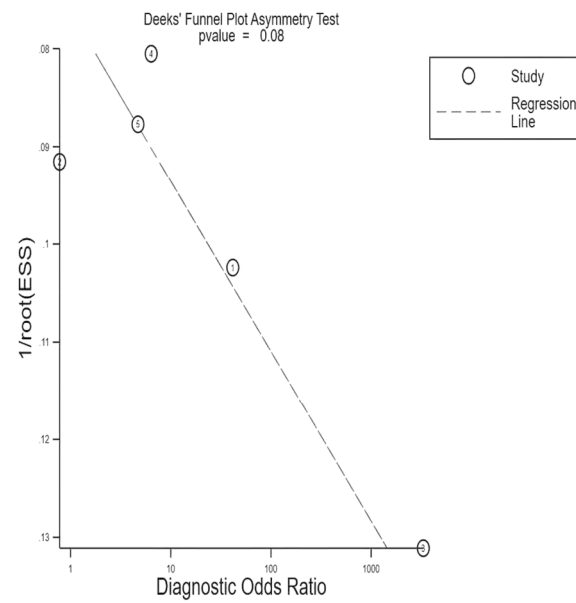

**(b)**

**Figure S8.** Deek's funnel plot for the evaluation of publication bias of uNAG **(a)** and uNAG/Cr **(b)** to distinguish between controls (healthy individuals) normo/microalbuminuric diabetic patients.
